# Supplementary material for: Investigating the synergistic potential of Si and biochar to immobilize Ni in a Ni-contaminated calcareous soil after Zea mays L. cultivation
Source: Copernicus journal article supplement (doi:10.5194/soil-10-487-2024), 2024-07-09
Supplement: Supplementary file 1 [file soil-10-487-2024-supplement.pdf]

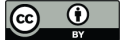

*Supplement of*

**Investigating the synergistic potential of Si and biochar to immobilize Ni in a Ni-contaminated calcareous soil after *Zea mays* L. cultivation**

**Hamid Reza Boostani et al.**

*Correspondence to:* Hamid Reza Boostani ([hr.boostani@shirazu.ac.ir](mailto:hr.boostani@shirazu.ac.ir))

The copyright of individual parts of the supplement might differ from the article licence.

**supplementary information**

Effects of biochars and Si application levels on the soil pH after corn cultivation.

|                | C       | SM300   | SM500   | RH300   | RH500   | Mean   |
|----------------|---------|---------|---------|---------|---------|--------|
| S <sub>0</sub> | 7.69 j  | 7.88 i  | 7.96 gh | 7.73 j  | 7.84 i  | 7.82 C |
| S <sub>1</sub> | 8.07 de | 7.99 fg | 8.13 cd | 7.90 hi | 8.04 ef | 8.02 B |
| S <sub>2</sub> | 8.28 a  | 8.17 bc | 8.22 ab | 8.05 ef | 8.16 bc | 8.18 A |
| Mean           | 8.01 B  | 8.01 B  | 8.10 A  | 7.89 C  | 8.01 B  |        |

Notes: C, control; SM300, sheep manure biochar generated at 300 °C; SM500, sheep manure biochar generated at 500 °C; RH300, rice husk biochar produced at 300 °C; RH500, rice husk biochar produced at 500 °C; S<sub>0</sub>, without Si application; S<sub>1</sub>, addition of 250 mg Si kg<sup>-1</sup> soil; S<sub>2</sub>, addition of 500 mg Si kg<sup>-1</sup> soil. Numbers followed by same letters in each section, are not significantly (P<0.05) different.

The Pearson correlation coefficients (r) among the Ni concentration in corn shoots with Ni content in various soil chemical fractions and soil pH.

|                            | WsEx   | Car                | OM     | MnOx   | AFeOx               | CFeOx   | Res                 | Soil pH |
|----------------------------|--------|--------------------|--------|--------|---------------------|---------|---------------------|---------|
| Ni Concentration in shoots | 0.62** | 0.28 <sup>ns</sup> | 0.47** | 0.54** | -0.28 <sup>ns</sup> | -0.50** | -0.14 <sup>ns</sup> | -0.60** |

Notes: WsEx, water soluble and exchangeable fraction; OM, organic fraction; MnOx, bound to manganese oxides; AFeOx, bound to amorphous iron oxides; CFeOx, bound to crystalline iron oxides; Res, residual fraction.

\*\* and <sup>ns</sup> indicate significance at the 0.01 probability level and non-significant, respectively.
